# Supplementary material
Source: PubMed Central journal article supplement (PMC7263932)
Supplement: jcbn19-98sf01.pdf [file jcbn19-98sf01.pdf]

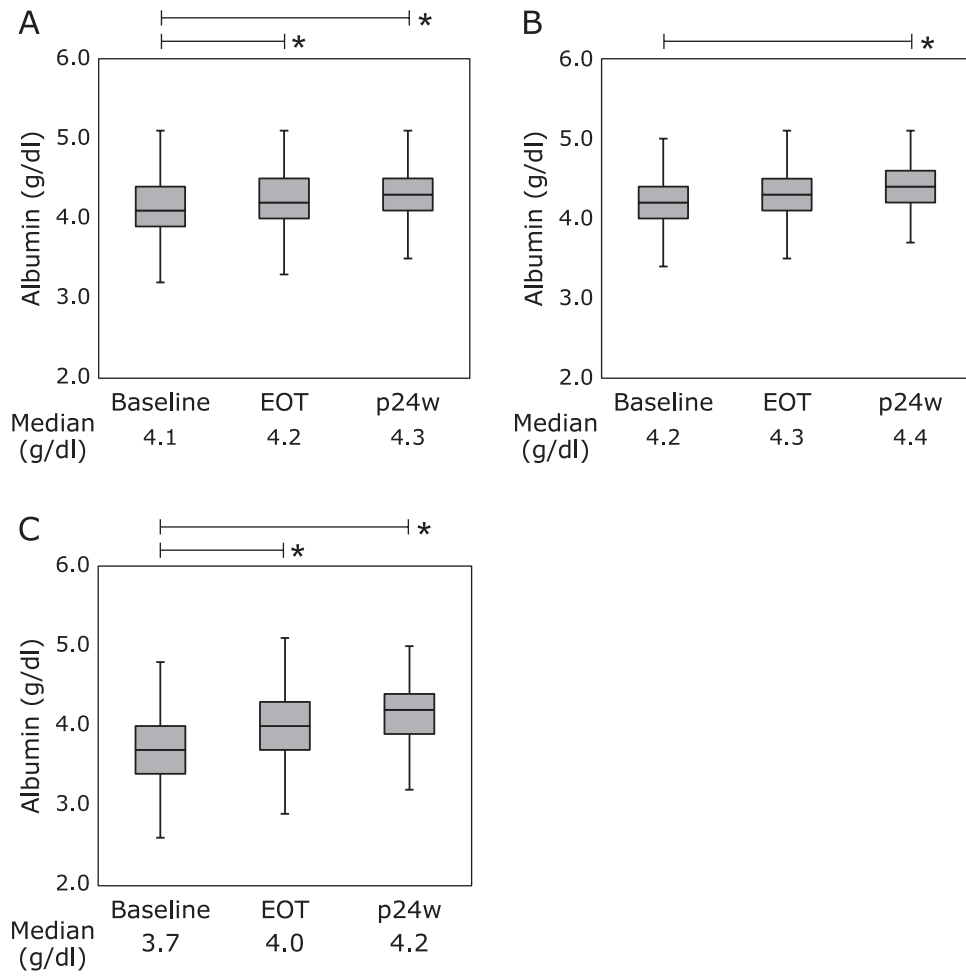

**Supplemental Fig. 1.** Changes in the albumin levels at baseline, EOT, and p24W ( $*p < 0.001$ ). EOT, end of treatment; p24w, 24 weeks after EOT. (A) Overall. (B) Non-cirrhotic patients. (C) Cirrhotic patients.
