# Supplementary material
Source: PubMed Central journal article supplement (PMC7263932)
Supplement: jcbn19-98sf02.pdf [file jcbn19-98sf02.pdf]

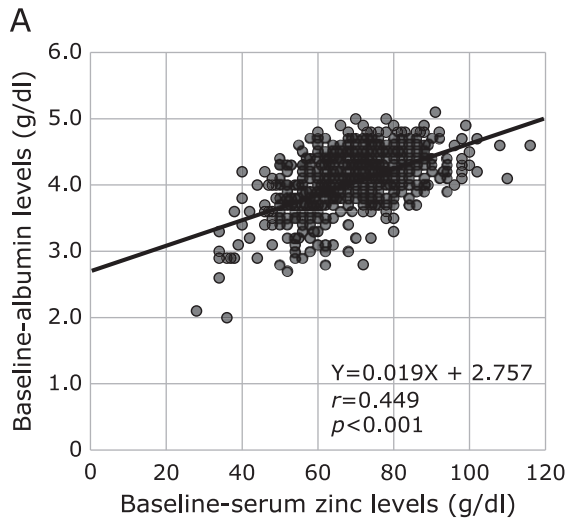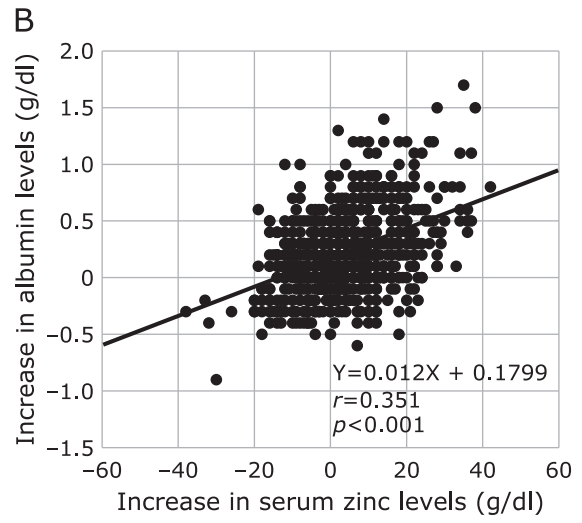

**Supplemental Fig. 2.** Correlation of serum zinc levels and albumin levels p24w, 24 weeks after EOT. (A) Correlation of serum zinc levels and albumin levels at baseline. (B) Correlation of an increase in serum zinc levels and an increase in albumin levels from baseline to p24w.
